# Supplementary material
Source: PubMed Central journal article supplement (PMC9835348)

**Additional file 4: Prior Model Iterations. This figure demonstrates the evolution of our model and the shifts in the development from a simple flowchart to Venn-diagrams, to panels that illustrate the movement observed between and within each level.**

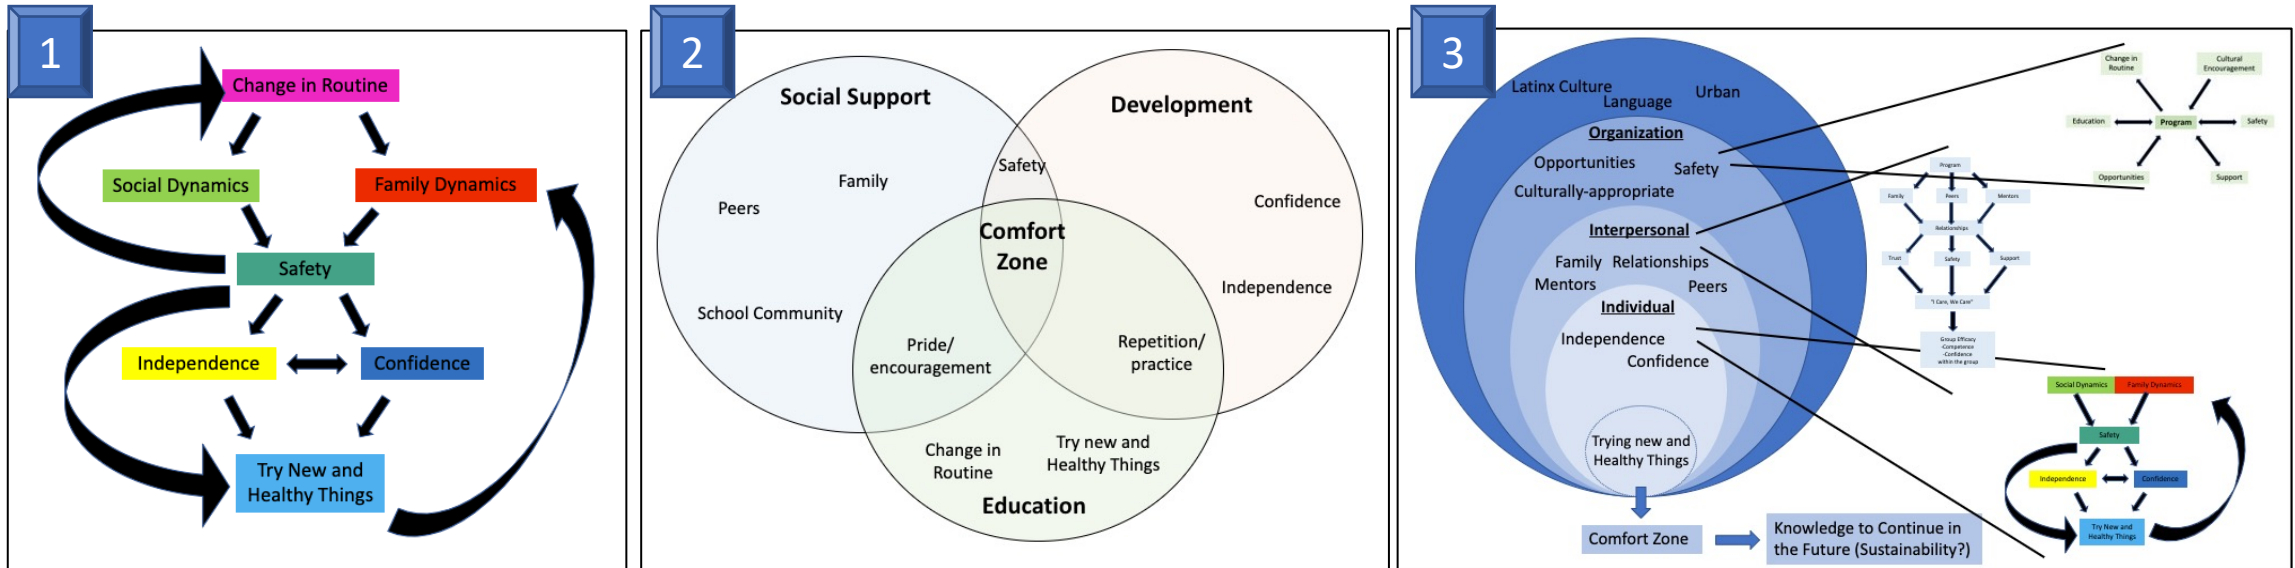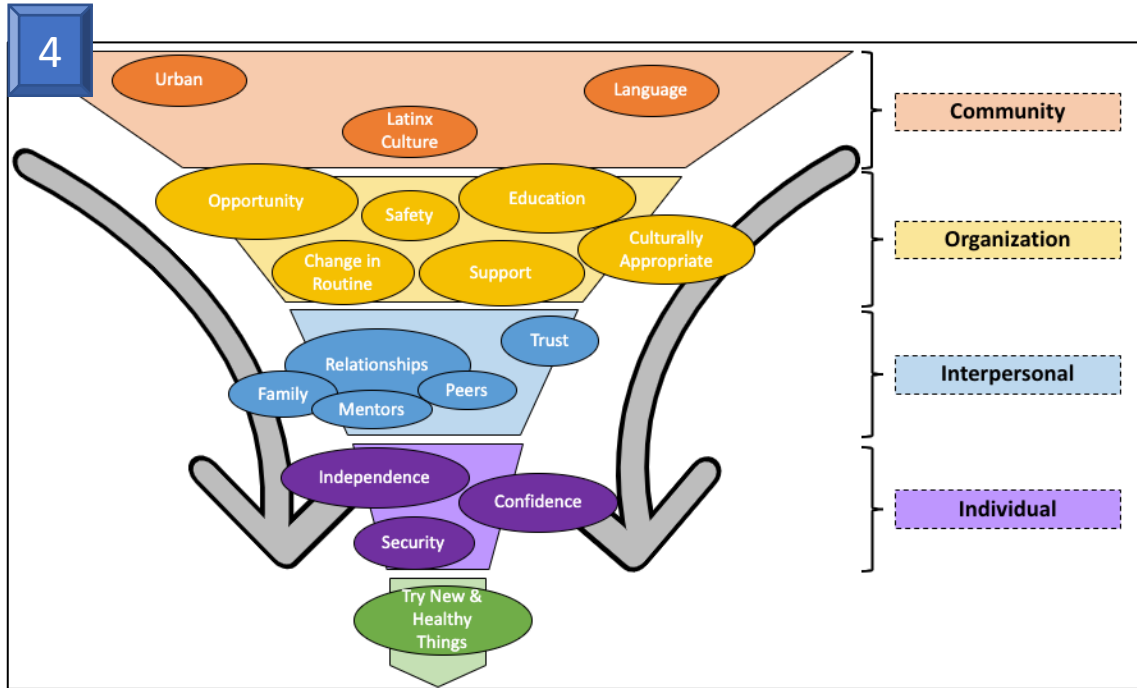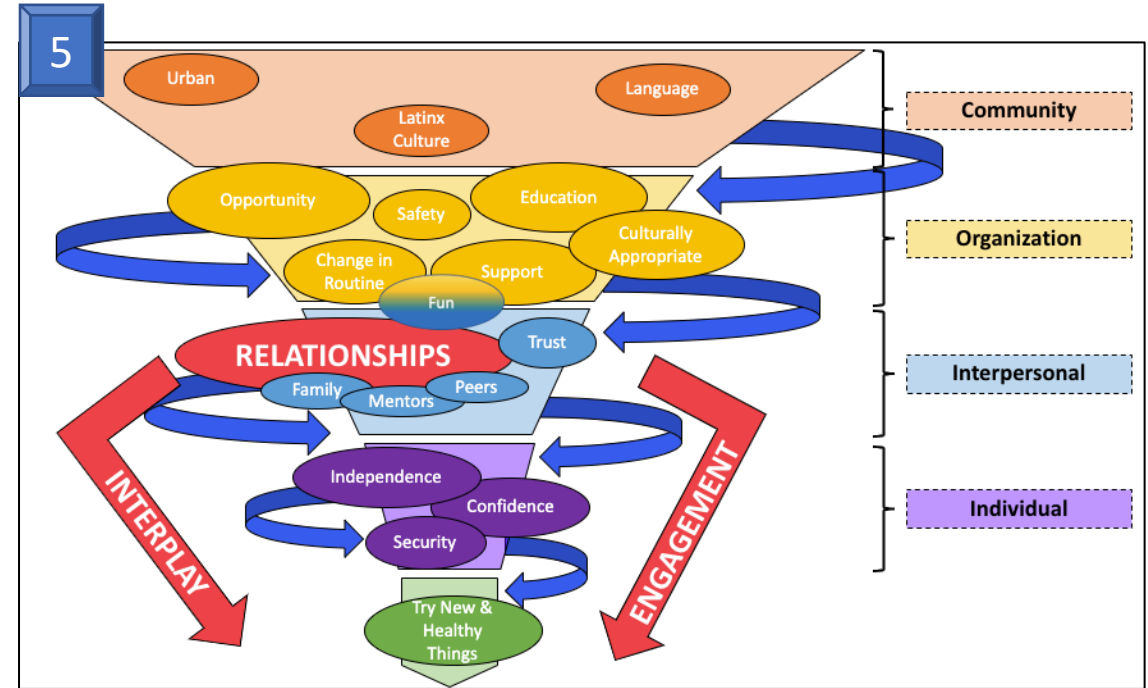

Supplement: 12889_2023_15005_MOESM4_ESM.pdf [file 12889_2023_15005_MOESM4_ESM.pdf]
